# Supplementary material for: Immobilization of Polyiodide Redox Species in Porous Carbon for Battery-Like Electrodes in Eco-Friendly Hybrid Electrochemical Capacitors
Source: PubMed Central journal article supplement (PMC6835913; doi:10.3390/nano9101413), 2019-10-03
Supplement: nanomaterials-09-01413-s001.pdf [file nanomaterials-09-01413-s001.pdf]

# Immobilization of Polyiodide Redox Species in Porous Carbon for Battery-Like Electrodes in Eco-Friendly Hybrid Electrochemical Capacitors

Q. Abbas <sup>1,\*†</sup>, H. Fitzek <sup>2</sup>, H. Schrottner<sup>2,3</sup>, S. Dsoke <sup>4</sup> and B. Gollas <sup>1</sup>

<sup>1</sup> Institute for Chemistry and Technology of Materials, Graz University of Technology, 8010 Graz, Austria; Bernhard.Gollas@tugraz.at

<sup>2</sup> Graz Centre for Electron Microscopy, Steyrergasse 17, 8010 Graz, Austria; harald.fitzek@felmi-zfe.at (H.F.); hartmuth.schrottner@felmi-zfe.at (H.S.)

<sup>3</sup> Institute of Electron Microscopy and Nanoanalysis, NAWI Graz, Graz University of Technology, Steyrergasse 17, 8010 Graz, Austria

<sup>4</sup> Institute for Applied Materials (IAM), Karlsruhe Institute of Technology (KIT), Hermann-von-Helmholtz-Platz 1, 76344 Eggenstein-Leopoldshafen, Germany; sonia.dsoke@kit.edu

\* Correspondence: qamar.abbas@tugraz.at

† The author is currently on leave from Poznan University of Technology, Poland

**Table 1.** Porous data of KOH activated carbon (KAC) and activated carbon cloth (ACC).

| Activated carbon | Surface area (m <sup>2</sup> g <sup>-1</sup> ) | Micropore volume (cm <sup>3</sup> g <sup>-1</sup> ) | Mesopore volume (cm <sup>3</sup> g <sup>-1</sup> ) |
|------------------|------------------------------------------------|-----------------------------------------------------|----------------------------------------------------|
| ACC              | 2320                                           | 0.84                                                | 0.06                                               |
| KAC              | 2300                                           | 0.88                                                | 0.02                                               |

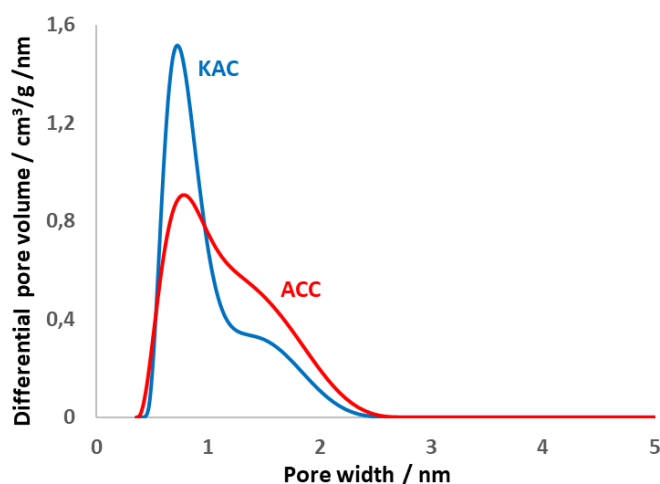

**Figure 1.** Pore size distribution of KAC and activated carbon cloth (ACC).

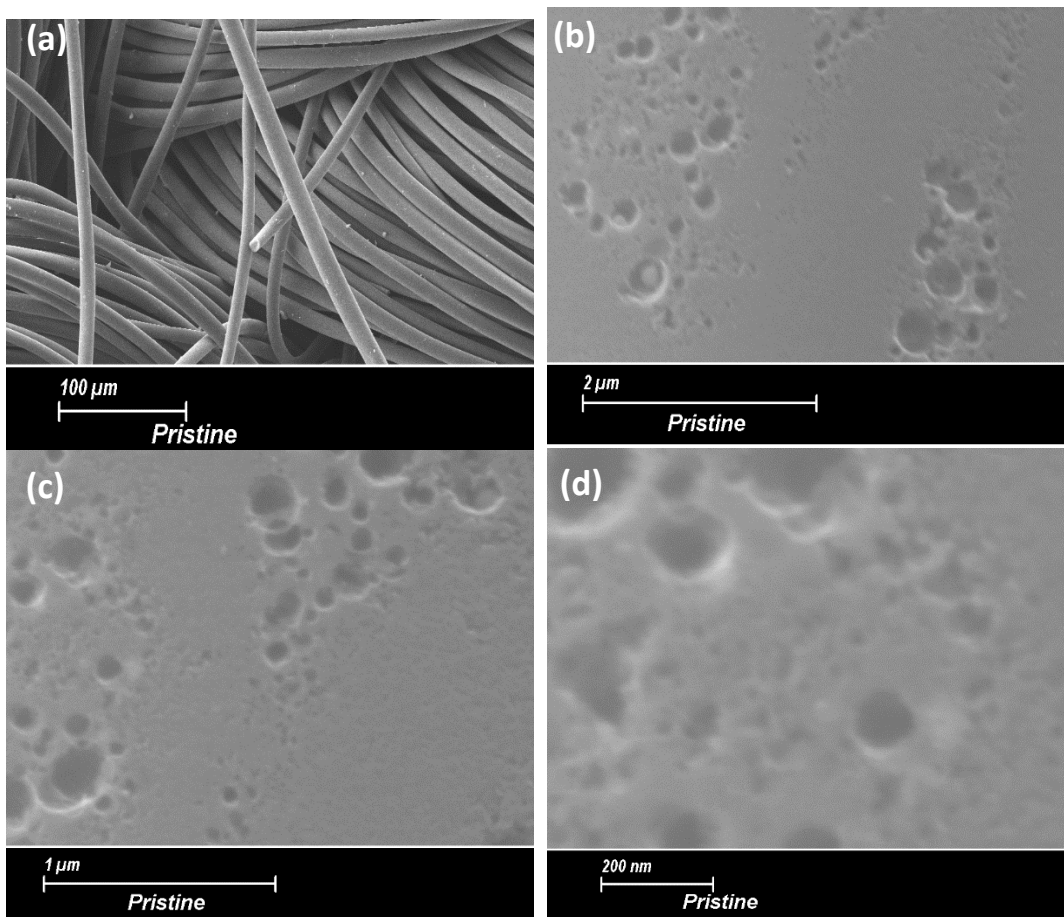

**Figure 2.** Scanning electron micrographs of pristine activated carbon cloth (ACC 507-20).

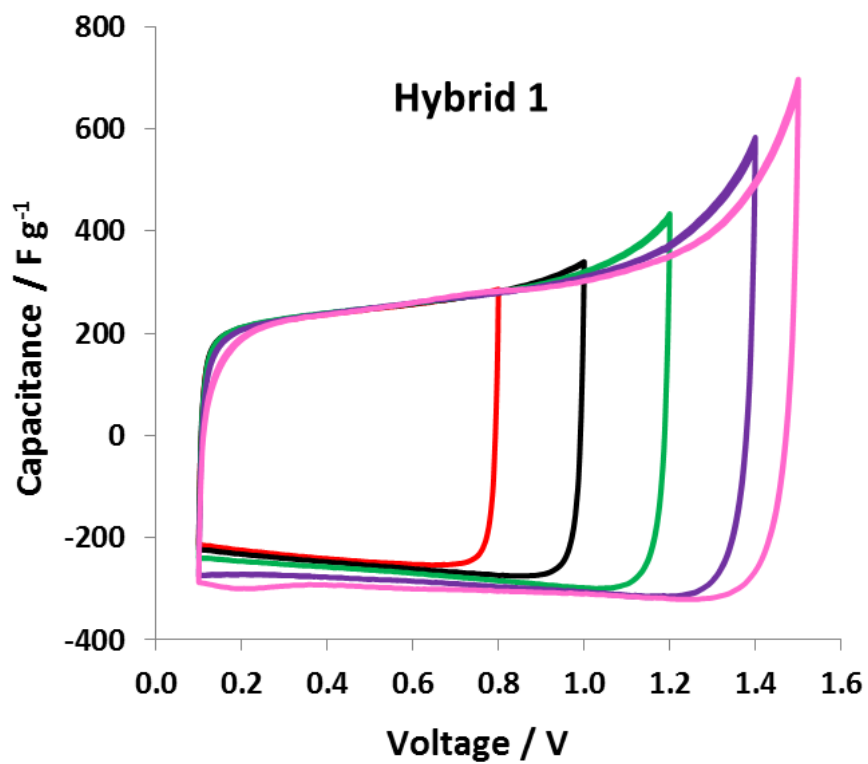

**Figure 3.** Cyclic voltammograms of hybrid cell 1 in 1 mol L<sup>-1</sup> NaI at 2 mV s<sup>-1</sup> with gradual voltage increase from 0.1 V up to 1.5 V.

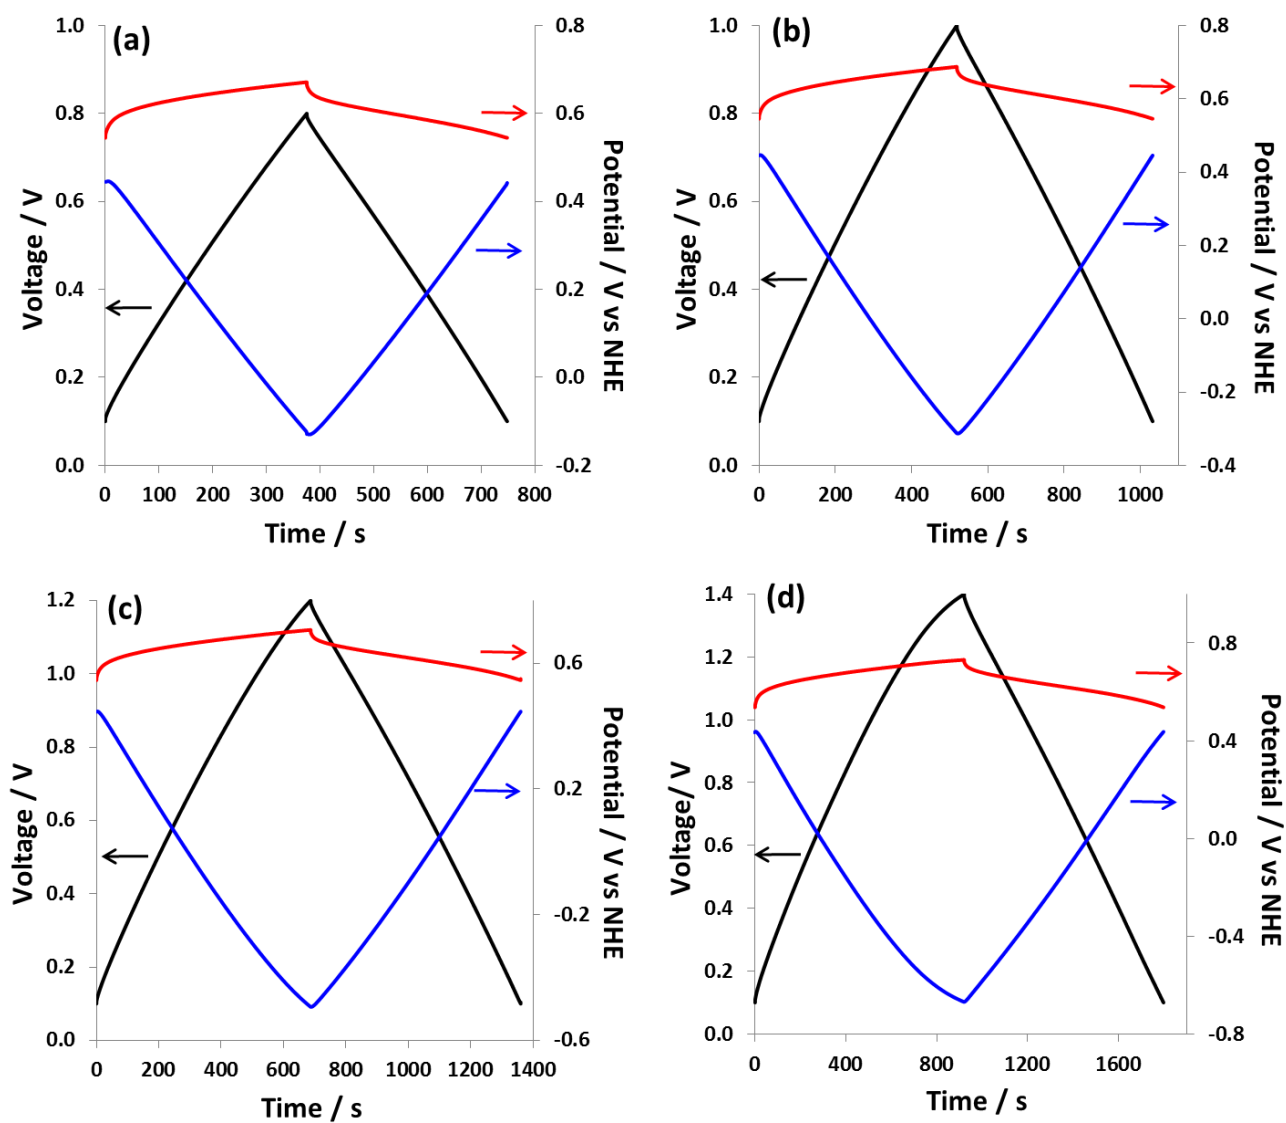

**Figure 4.** Galvanostatic charge/discharge curves of hybrid cell 1 in two electrode cell equipped with reference electrode in 1 mol L<sup>-1</sup> NaI as electrolyte at specific current of 0.1 A g<sup>-1</sup> up to cell voltage (a) 0.8 V, (b) 1.0 V, (c) 1.2 V and (d) 1.4 V.

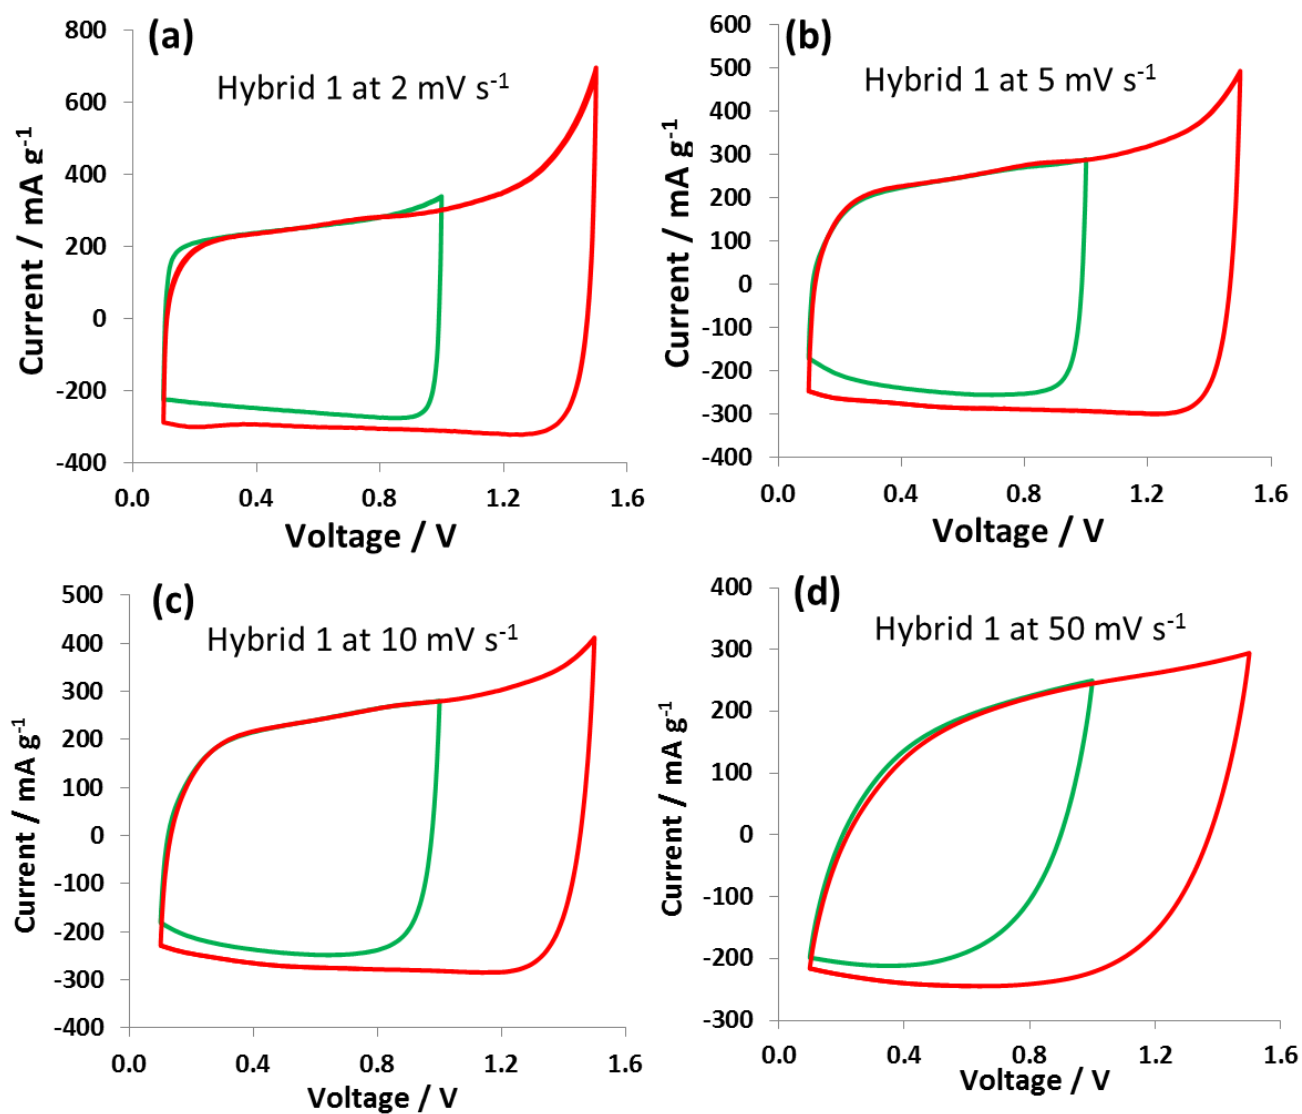

**Figure 5.** Two electrode cell performance of hybrid cell 1 in  $1 \text{ mol L}^{-1} \text{ NaI}$  with CVs up to  $1.0 \text{ V}$  and  $1.5 \text{ V}$  using scan rate of (a)  $2 \text{ mV s}^{-1}$ , (b)  $5 \text{ mV s}^{-1}$ , (c)  $10 \text{ mV s}^{-1}$  and (d)  $50 \text{ mV s}^{-1}$ .

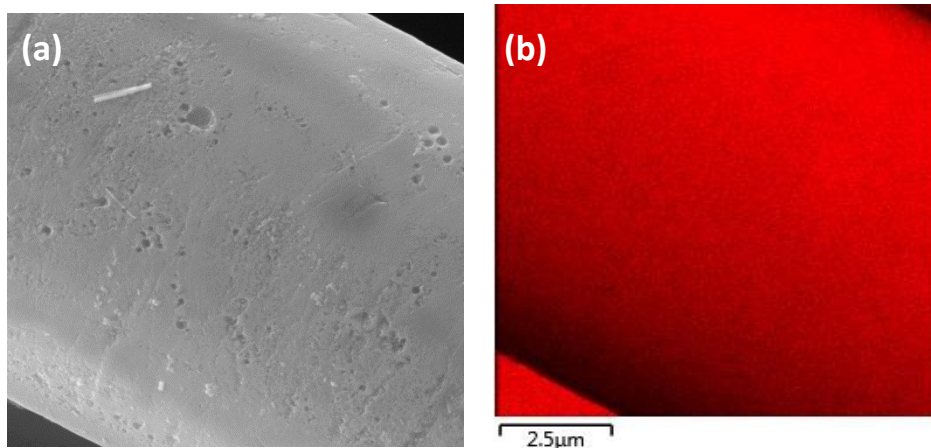

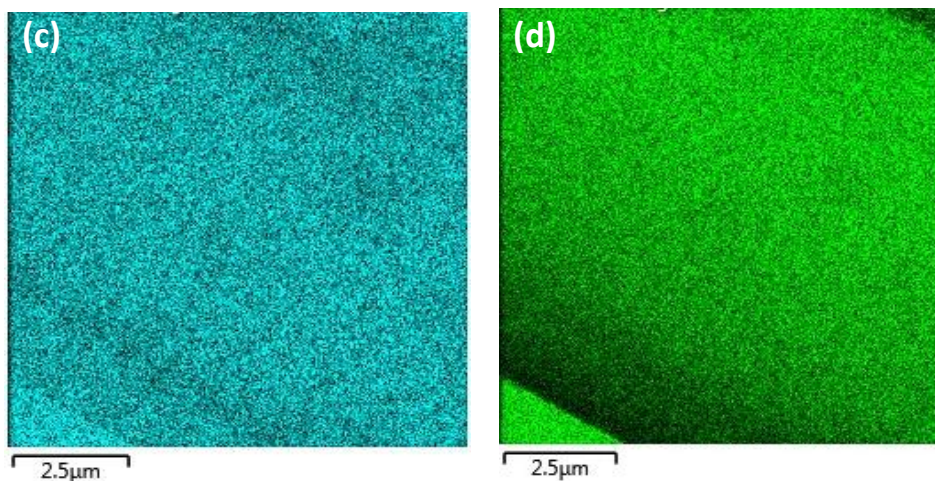

**Figure 6.** (a) Scanning electron micrograph of positive ACC electrode with corresponding surface mapping of (b) carbon, (c) iodine and (d) sodium.

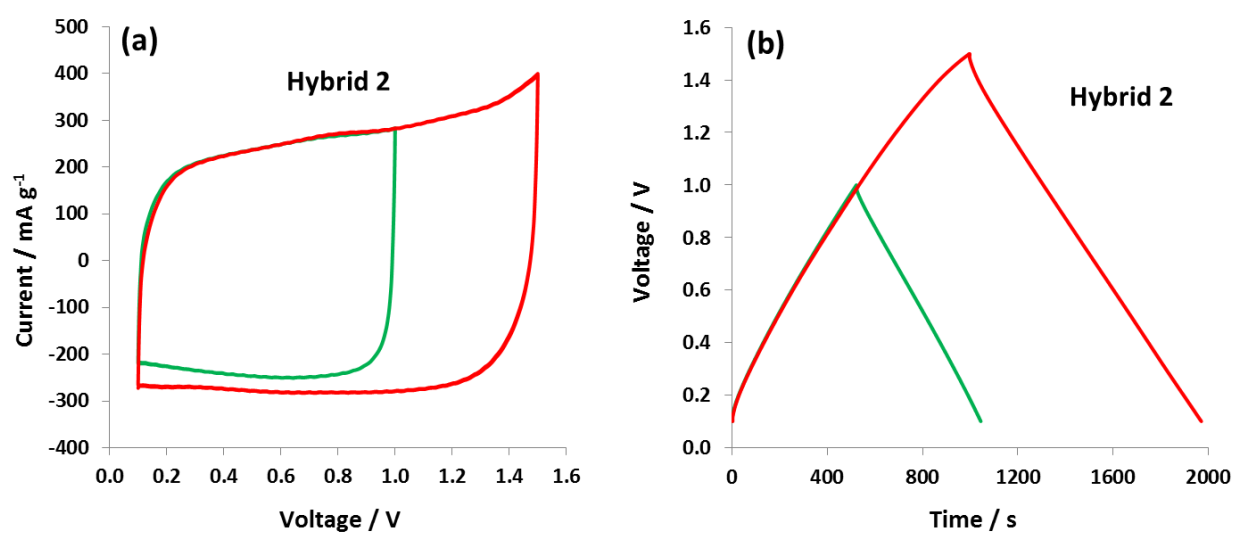

**Figure 7.** Two electrode cell performance of hybrid cell 2 in 1 mol L<sup>-1</sup> NaNO<sub>3</sub> with (a) CVs and (b) galvanostatic charge/discharge up to 1.0 V and 1.5 V using scan rate of 2 mV s<sup>-1</sup> and specific current of 0.1 A g<sup>-1</sup> respectively.

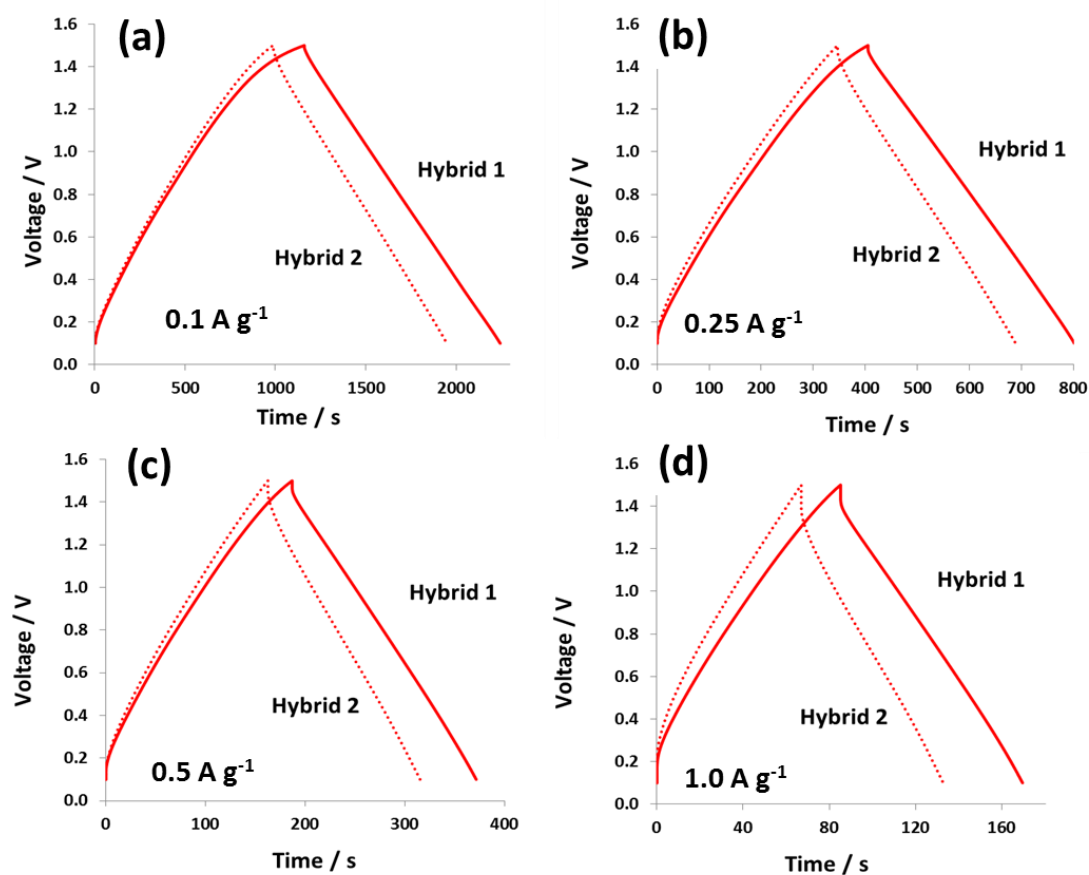

**Figure 8.** Comparison of two electrode cell performance of hybrid cell 1 in 1 mol L<sup>-1</sup> NaI and hybrid cell 2 in 1 mol L<sup>-1</sup> NaNO<sub>3</sub> with galvanostatic charge/discharge up to 1.5 V using specific current (a) 0.1 A g<sup>-1</sup>, (b) 0.25 A g<sup>-1</sup>, (c) 0.5 A g<sup>-1</sup> and (d) 1.0 A g<sup>-1</sup>

**Table 2.** Performance comparison during 5000 galvanostatic charge/discharge cycles for various hybrid cells using iodides as redox active specie in aqueous electrolyte.

| Electrolyte.                        | Cell voltage | Number of galvanostatic charge/discharge cycles | Percentage of capacitance loss | Ref.      |
|-------------------------------------|--------------|-------------------------------------------------|--------------------------------|-----------|
| KI+Na <sub>2</sub> MoO <sub>4</sub> | 1.0 V        | 5000                                            | 35.4%                          | 1         |
| LiTFSI+KI                           | 1.8 V        | 10000                                           | 21%                            | 2         |
| Li <sub>2</sub> SO <sub>4</sub> +KI | 1.6 V        | 10000                                           | 9%                             | 3         |
| MnSO <sub>4</sub> +KI               | 1.5 V        | 10000                                           | 8%                             | 4         |
| ChNO <sub>3</sub> +ChI              | 1.5 V        | 20000                                           | 8%                             | 5         |
| NaNO <sub>3</sub>                   | 1.5 V        | 5000                                            | No capacitance decay           | This work |

#### References:

1. D. Xu, W. Hu, X. Na Sun, P. Cui, X. Ying Chen, *J. Power Sources* 341 (2017) 448-456.
2. D. Reber, R-S. Kühnel, C. Battaglia, *Sustainable Energy Fuels*, 1 (2017) 2155-2161.
3. Q. Abbas, P. Babuchowska, E. Frackowiak, F. Béguin, *J. Power Sources* 326 (2016) 652-659.
4. P. Przygocki, Q. Abbas, P. Babuchowska, F. Béguin, *Carbon* 125 (2017) 391-400.

5. P. Przygocki, Q. Abbas, B. Gorska, F. Béguin, *J. Power Sources* 427 (2019) 283-292.
